# Supplementary material for: NuA4 and H2A.Z control environmental responses and autotrophic growth in Arabidopsis
Source: PubMed Central journal article supplement (PMC8755797; doi:10.1038/s41467-021-27882-5), 2022-01-12
Supplement: 41467_2021_27882_MOESM3_ESM.pdf [file 41467_2021_27882_MOESM3_ESM.pdf]

### **Description of Additional Supplementary Files**

File Name: Supplementary Data 1

Description: All nuclear genes showing at least 1.5- fold reduction in transcript level in Atepl1-2 as determined by RNA-seq

File Name: Supplementary Data 2

Description: All nuclear genes showing at least 1.5- fold reduction in transcript level in glk as determined by RNAseq

File Name: Supplementary Data 3

Description: All nuclear genes showing at least 1.5- fold reduction in transcript level in Ateaf1-1 as determined by RNA-seq

File Name: Supplementary Data 4

Description: All nuclear genes showing at least 1.5- fold increase in transcript level in Atepl1-2 as determined by RNA-seq

File Name: Supplementary Data 5

Description: All nuclear genes showing at least 1.5- fold increase in transcript level in glk as determined by RNAseq

File Name: Supplementary Data 6

Description: All nuclear genes showing at least 1.5- fold increase in transcript level in Ateaf1-1 as determined by RNA-seq

File Name: Supplementary Data 7

Description: Genes downregulated in glk, Atepl1-2 or Ateaf1-1 mapped to GO IDs.

File Name: Supplementary Data 8

Description: PANTHER Overrepresentation Test of genes downregulated in Atepl1-2 against GO biological process

File Name: Supplementary Data 9

Description: PANTHER Overrepresentation Test of genes downregulated in Atepl1-2 against GO cellular component

File Name: Supplementary Data 10

Description: Genes upregulated in glk, Atepl1-2 or Ateaf1-1 mapped to GO IDs.

File Name: Supplementary Data 11

Description: PANTHER Overrepresentation Test of genes upregulated in Atepl1-2 against GO biological process

File Name: Supplementary Data 12

Description: PANTHER Overrepresentation Test of genes upregulated in Atepl1-2 against GO cellular component

File Name: Supplementary Data 13

Description: List of significantly identified proteins in AtEPL1B TAP #1 samples.

File Name: Supplementary Data 14

Description: List of significantly identified proteins in AtEPL1B TAP #2 samples.

File Name: Supplementary Data 15

Description: Protein identification details for AtEPL1B TAP #1 samples.

File Name: Supplementary Data 16

Description: Protein identification details for AtEPL1B TAP #2 samples.

File Name: Supplementary Data 17

Description: Selection of NuA4- dependent genes based on changes in transcription and acetylation of H3K9 and H4K5

File Name: Supplementary Data 18

Description: GO analysis of NuA4 dependent genes carried out with use of DAVID annotation tool

File Name: Supplementary Data 19

Description: List of oligonucleotides used in the manuscript
